# Supplementary material for: Cell cycle Start is coupled to entry into the yeast metabolic cycle across diverse strains and growth rates
Source: PubMed Central journal article supplement — Mol Biol Cell. 2016 Jan 1;27(1):64–74. doi: 10.1091/mbc.E15-07-0454 (PMC4694762; doi:10.1091/mbc.e15-07-0454), 2016-01-01
Supplement: supp_E15-07-0454v1_CombinedSupMats.pdf [file supp_E15-07-0454v1_CombinedSupMats.pdf]

# Supplemental Materials

*Molecular Biology of the Cell*

Burnetti et al.

## **Supplementary Material**

**Authors:** Anthony J. Burnetti<sup>\*,†,‡,§</sup>, Mert Aydin<sup>‡,§</sup>, and Nicolas E. Buchler<sup>‡,§</sup>

\* *Program in Cellular & Molecular Biology, Duke University, Durham, NC, 27708*

† *University Program in Genetics & Genomics, Duke University, Durham, NC, 27708*

‡ *Center for Genomic & Computational Biology, Duke University, Durham, NC 22710*

§ *Department of Biology, Duke University, Durham, NC 27708*

## TABLES

| Strain (ploidy)              | Medium           | Airflow (mL/min) | Reactor volume (mL) | Stirring speed (RPM) | pH   | Dilution rate (hr <sup>-1</sup> ) | CDC period (hours) | YMC period (hours) | References                         |
|------------------------------|------------------|------------------|---------------------|----------------------|------|-----------------------------------|--------------------|--------------------|------------------------------------|
| <b>LBGH1022 (diploid)</b>    | SD+1.0% glucose  | 550              | 3900                | 900                  | 5.5  | 0.05                              | 13.8               | 6.5                | (Küenzi and Fiechter, 1969)        |
| <b>LBGH1022 (diploid)</b>    | SD+7.0% glucose  | 6375             | 2550                | 900                  | 5.5  | 0.185                             | 3.7                | 2.5                | (Kaspar von Meyenburg, 1969)       |
| <b>LBGH1022 (diploid)</b>    | SD+1.0% glucose  | 3000             | 4000                | Vary(DO clamp)       | 5.5  | 0.2                               | 3.5                | 2.2                | (Parulekar <i>et al.</i> , 1986)   |
| <b>S288C (haploid)</b>       | YP+0.5% glucose  | 1000             | 350                 | 100-500              | Free | 0.066 - 0.170                     | 4.6 - 10.5         | 5.0 - 13.0         | (Porro <i>et al.</i> , 1988)       |
| <b>Fleischmann (diploid)</b> | SD+1.0% glucose  | 3000             | 1000                | Vary(DO clamp)       | 5.5  | 0.145                             | 4.8                | 3.5                | (Chen and McDonald, 1990)          |
| <b>S288C (haploid)</b>       | YP+0.5% glucose  | 1000             | 350                 | 200-300              | Free | 0.07                              | 10.0               | 15.0               | (Martegani <i>et al.</i> , 1990)   |
| <b>IFO0233 (diploid)</b>     | YP+2% glucose    | 200              | 1350                | 700                  | 4.0  | 0.08                              | 8.7                | 0.66               | (Satroudinov <i>et al.</i> , 1992) |
| <b>IFO0233 (diploid)</b>     | YP+2.2% glucose  | 150-1000         | 1200                | 800                  | 4.0  | 0.08                              | 8.7                | 0.66               | (Keulers <i>et al.</i> , 1996a)    |
| <b>IFO0233 (diploid)</b>     | YP+1.5% ethanol  | 180              | 1200                | 800                  | 4.0  | 0.085                             | 8.1                | 0.66               | (Keulers <i>et al.</i> , 1996b)    |
| <b>IFO0233 (diploid)</b>     | SD+2.2% glucose  | 200              | 1000                | 750                  | 3.4  | 0.050-0.125                       | 5.6-13.9           | 0.38 - 1.10        | (Murray and Marks, 2001)           |
| <b>IFO0233 (diploid)</b>     | SD+2.2% glucose  | 200              | 1000                | 750                  | 3.4  | 0.09                              | 7.7                | 0.8                | (Murray <i>et al.</i> , 2003)      |
| <b>CBS7336 (diploid)</b>     | SD+3.0% glucose  | 833              | 500                 |                      | 5.0  | 0.1                               | 6.9                | 4.0                | (Müller <i>et al.</i> , 2003)      |
| <b>IFO0233 (diploid)</b>     | SD+2.2% glucose  | 150              | 750                 | 750                  | 3.4  | 0.09                              | 7.7                | 0.8                | (Klevecz <i>et al.</i> , 2004)     |
| <b>CEN.PK (diploid)</b>      | SD+1.0% glucose  | 1000             | 1000                | 400                  | 3.4  | 0.09                              | 7.7                | 5.0                | (Tu <i>et al.</i> , 2005)          |
| <b>S288C (haploid)</b>       | YP+1.0% glucose  | 1000             | 500                 | 420                  | 5.0  | 0.1                               | 6.9                | 4.5                | (Xu and Tsurugi, 2006)             |
| <b>CEN.PK (haploid)</b>      | SD+1.0% glucose  | 1000             | 1000                | 400                  | 3.4  | 0.09                              | 7.7                | 4.5                | (Chen <i>et al.</i> , 2007)        |
| <b>CEN.PK (haploid)</b>      | YP+1.0% glucose  | 900              | 850                 | 550                  | 3.4  | 0.085                             | 8.1                | 3.8                | (Robertson <i>et al.</i> , 2008)   |
| <b>DBY12007 (diploid)</b>    | SD+0.08% glucose |                  | 300                 | 400                  | Free | 0.05-0.14                         | 5.0 - 13.9         | 1.0 - 4.0          | (Slavov and Botstein, 2011)        |
| <b>DBY12007 (diploid)</b>    | SD+100mM ethanol |                  | 500                 | 400                  | Free |                                   |                    | 4.2                | (Slavov <i>et al.</i> , 2011)      |

**Table S1: Strains, ploidy, medium, and chemostat settings across the yeast metabolic cycle literature.** Growth medium is categorized either as SD (synthetic defined) or YP (yeast extract and peptone). Constant pH was maintained via automatic addition of NaOH unless otherwise stated ("Free"). Constant pO<sub>2</sub> was maintained by automatic adjustment of impeller stirring speed ("Vary"). Unknown parameters were left blank.

| Strains  | $T_{max}$ (mins)                 | $\kappa$ (mins)                  | $b$ (mins)                       | $m$                                  |
|----------|----------------------------------|----------------------------------|----------------------------------|--------------------------------------|
| CEN.PK   | $9.45 \pm 4.84$<br>$\times 10^2$ | $1.72 \pm 1.33$<br>$\times 10^3$ | $9.75 \pm 0.79$<br>$\times 10^1$ | $-2.61 \pm 0.97$<br>$\times 10^{-2}$ |
| DBY12007 | $3.12 \pm 0.61$<br>$\times 10^2$ | $6.49 \pm 2.83$<br>$\times 10^2$ | $6.78 \pm 0.23$<br>$\times 10^1$ | $-2.10 \pm 0.28$<br>$\times 10^{-2}$ |

|               | $T_{max}/\kappa$                 | $b$ (mins)                       | $m$                                  |
|---------------|----------------------------------|----------------------------------|--------------------------------------|
| YPS670 (oak)  | $(5.18 \pm 0.32) \times 10^{-1}$ | $7.28 \pm 0.76$<br>$\times 10^1$ | $-3.41 \pm 1.48$<br>$\times 10^{-2}$ |
| YJM128 (lung) | $(3.06 \pm 0.33) \times 10^{-1}$ | $4.59 \pm 0.69$<br>$\times 10^1$ | $1.61 \pm 1.40$<br>$\times 10^{-2}$  |

**Table S2: Best-fit parameters of the mixed model to YMC and HOC across strains.** The mixed model is a hyperbolic model ( $T_{max}$ ,  $\kappa$ ) fit to  $T_{ymc}$  [left] and a linear model ( $b$ ,  $m$ ) fit to  $T_{hoc}$  [right] where  $T_{ioc} = T_{ymc} - T_{hoc}$ . For wild isolates YJM128 and YPS670, the best mixed model fit was indistinguishable from a best linear fit, where  $b=0$  and  $m = T_{max}/\kappa$  for  $T_{ymc}$ ; see Figure S3.

## FIGURES

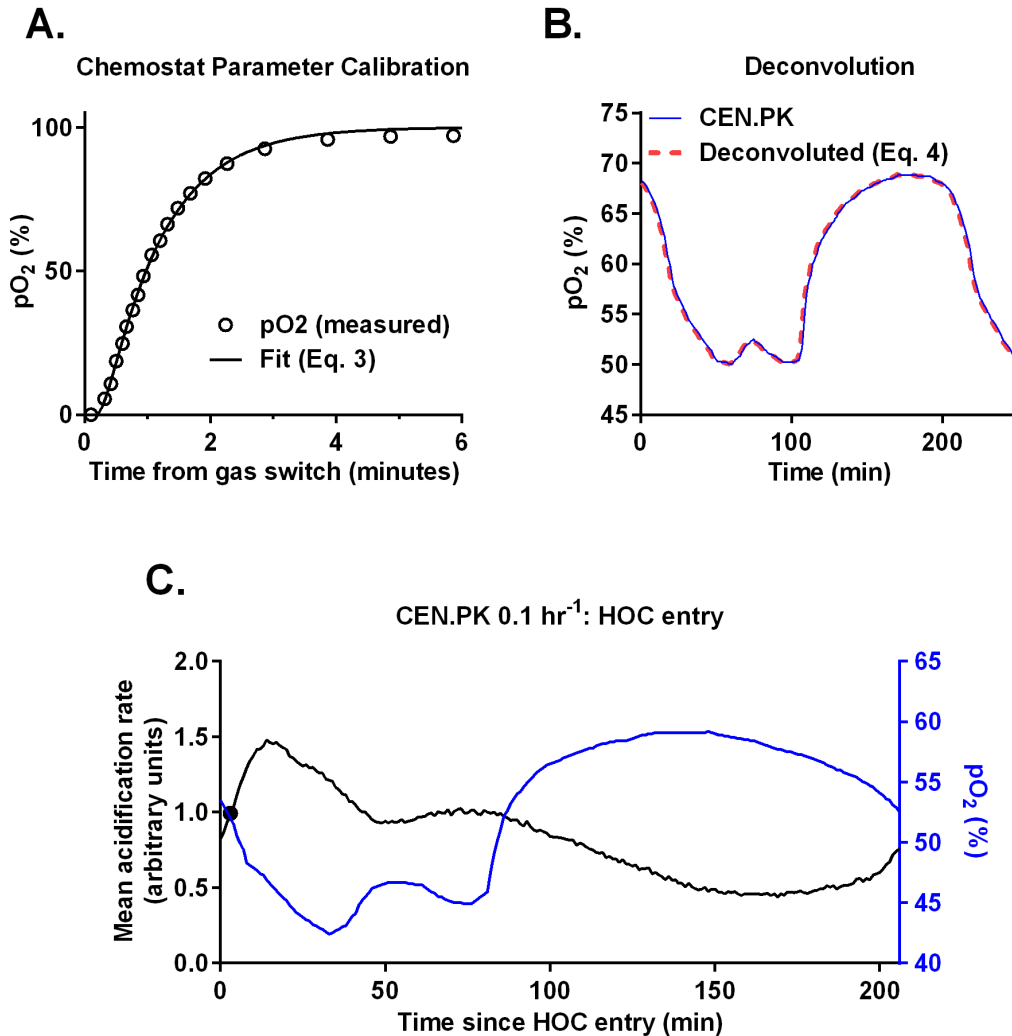

**Figure S1: Calibration of pO<sub>2</sub> and definition of HOC.** (A) Probe pO<sub>2</sub> reached equilibrium within minutes upon switching the chemostat from nitrogen gas to room air at t=0 mins. These data were fit to Eq. 3 to estimate  $k = 1.09 \text{ mins}^{-1}$ ,  $\tau_r = 0.149 \text{ mins}$ , and  $t_0 = 0.181 \text{ minutes}$ . (B) Using these parameters, we de-convolved the measured pO<sub>2</sub> trace (blue) to instantaneous equilibrium pO<sub>2</sub> levels (dashed red) using Eq. 4. The de-convolved data is nearly identical to the original data, where the primary difference is  $\sim 1$  minute time shift. (C) We defined entry into HOC as the time at which decreasing pO<sub>2</sub> reached 65% of the full peak-to-trough. This definition of entry into HOC was coincident with the acidification rate reaching 50% of peak-to-trough levels. Chemostat acidification is co-incident with the catabolism of storage carbohydrates, fermentation of the excess glucose, secretion of ethanol and acetate, and acidification of the medium. For consistency, we defined entry into LOC as the time at which increasing pO<sub>2</sub> had risen to 65% of the full peak-to-trough.

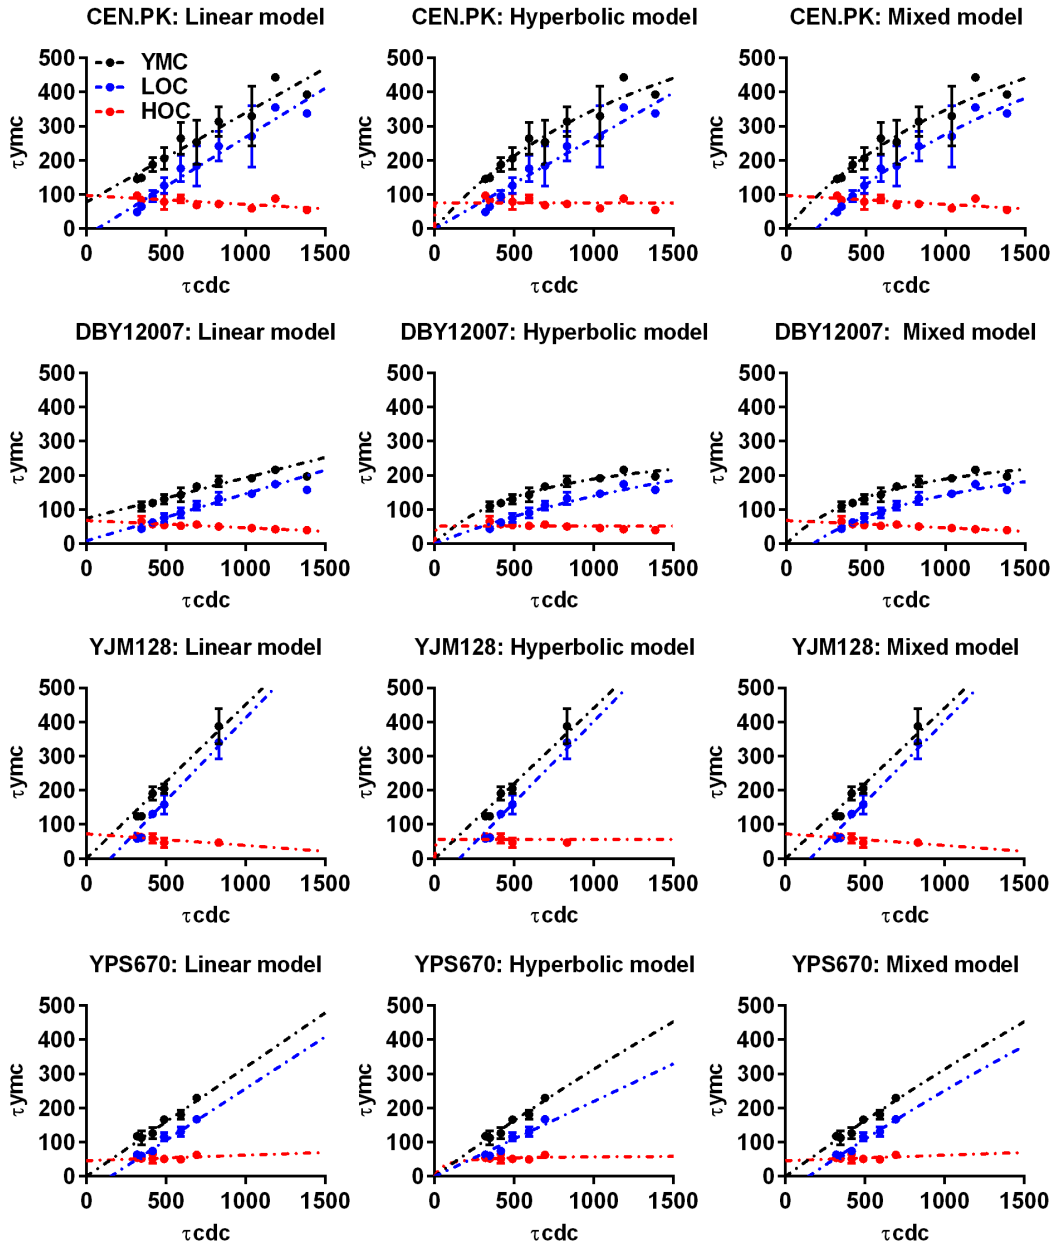

**Figure S2: Best-fit of linear, hyperbolic, and mixed models to YMC data.** Plots of  $\tau_{ymc}$  (black dots),  $\tau_{hoc}$  (red dots), and  $\tau_{loc}$  (blue dots) as a function of CDC period ( $\tau_{cdc}$ ) for CEN.PK, DBY12007, YJM128 (lung), and YPS670 (oak). For clarity, we plotted the average and standard deviation of time-series averages of biological replicates at identical dilution rates. Linear, hyperbolic, and mixed models (dashed lines) were fit to  $\tau_{ymc}$ ,  $\tau_{loc}$ , and  $\tau_{hoc}$  for each strain. Linear models (Eq. 8) were limited to positive  $\tau$ -intercepts ( $b > 0$ ) to avoid the unphysical notion of a negative  $\tau_{ymc}$ . Hyperbolic models (Eq. 9) were unconstrained. Mixed models utilized the hyperbolic fit to  $\tau_{ymc}$ , the linear fit to  $\tau_{hoc}$ , and the difference between them for  $\tau_{loc}$ .

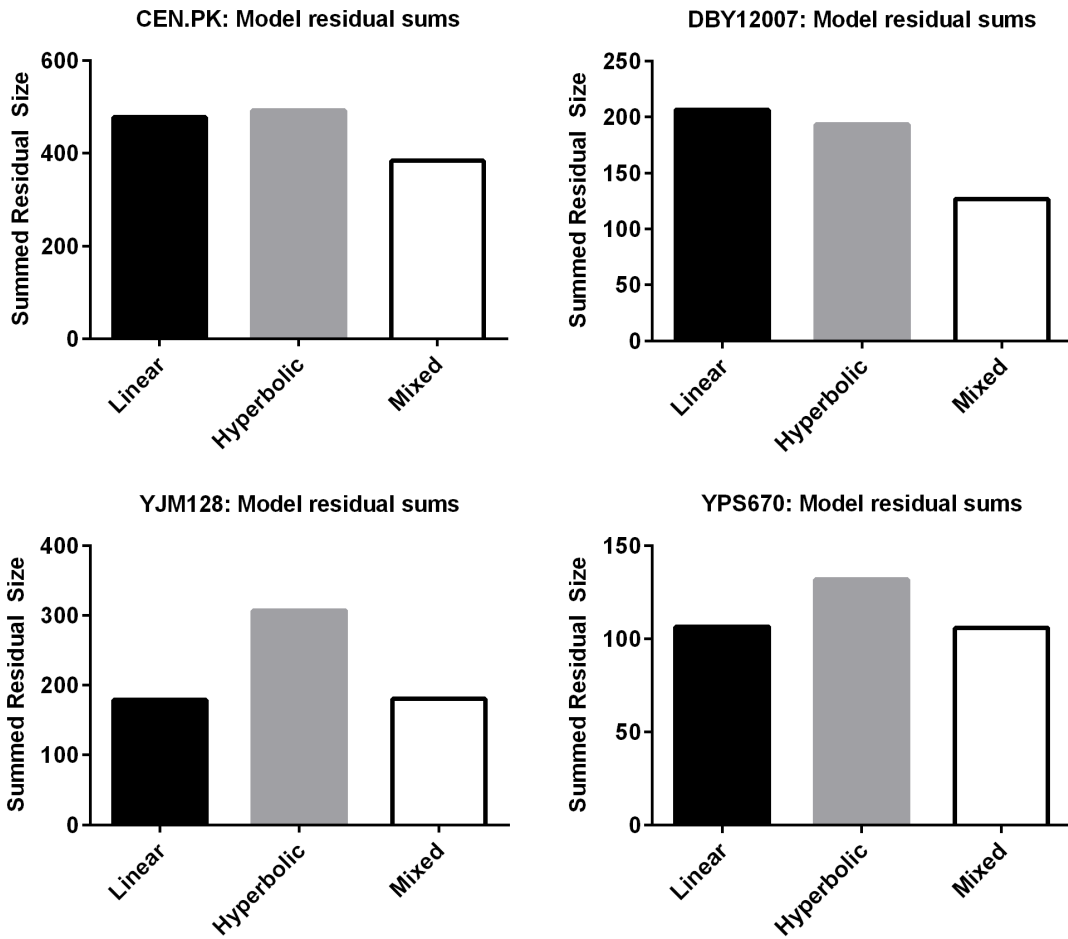

**Figure S3: Residuals of best-fit linear, hyperbolic, and mixed models.** Residual sums for each strain and model indicate that the mixed model was optimal for laboratory strains CEN.PK and DBY12007. All linear and all hyperbolic models were indistinguishable for wild isolates YJM128 (lung) and YPS670 (oak). Thus, we used the mixed model for all strains.

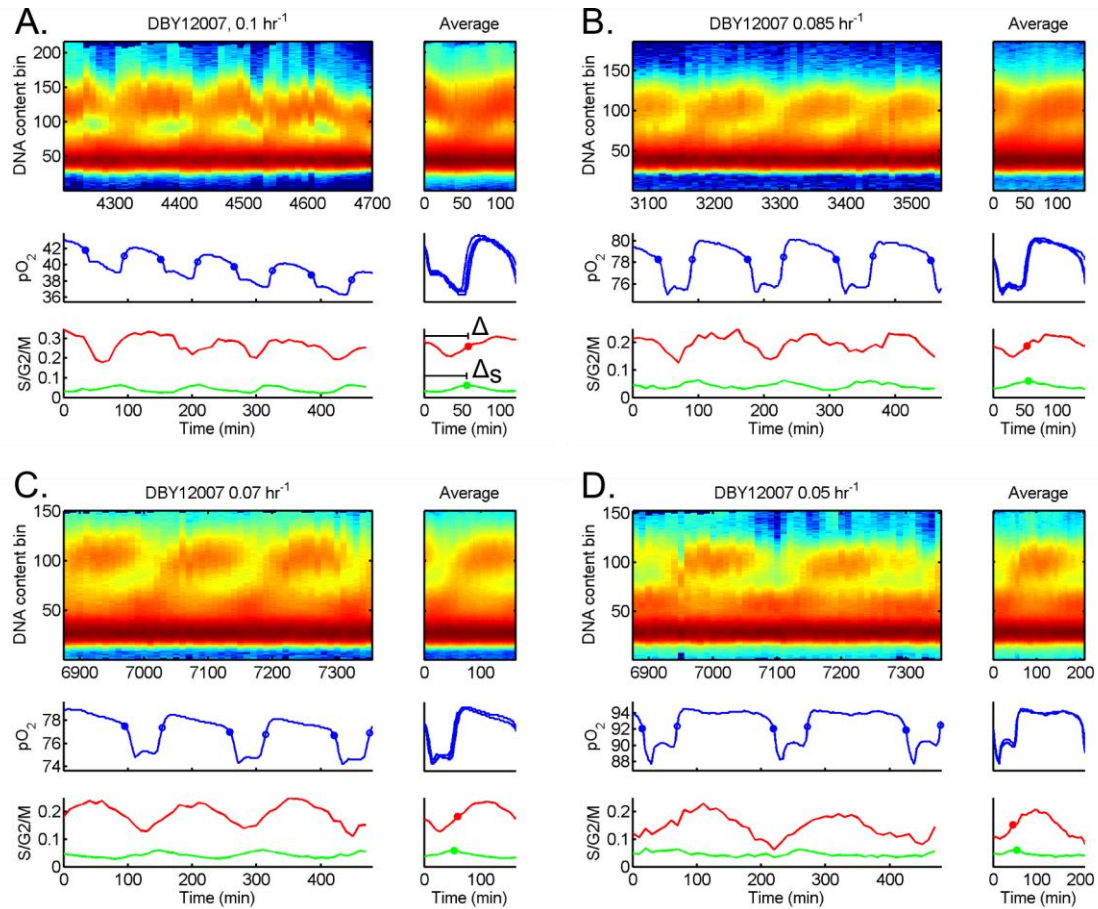

**Figure S4: Timing of DNA replication relative to HOC in strain DBY12007 across growth rates.** Additional cell cycle analysis for strain DBY12007 at different dilution rates: (A)  $0.1 \text{ hr}^{-1}$ , (B)  $0.085 \text{ hr}^{-1}$ , (C)  $0.07 \text{ hr}^{-1}$ , (D)  $0.05 \text{ hr}^{-1}$ . Data displayed as in Figure 5.



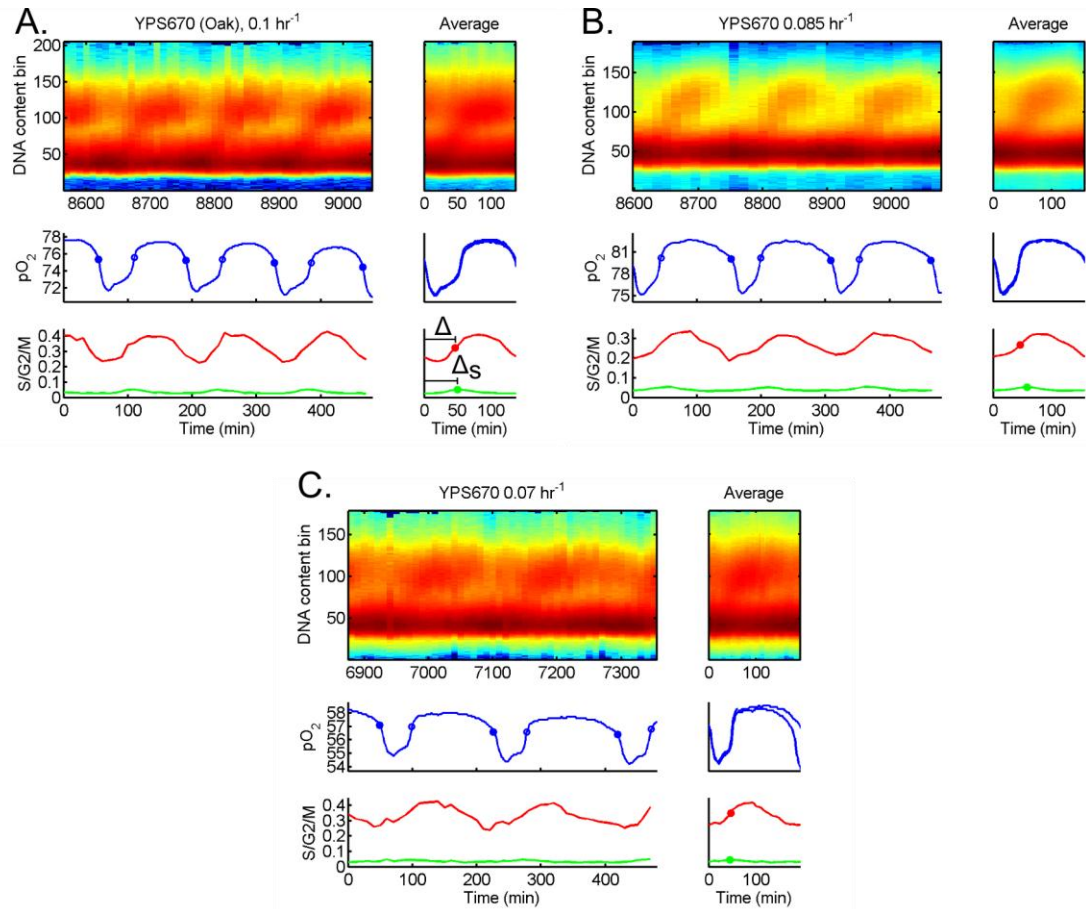

**Figure S5: Timing of DNA replication relative to HOC in strain YPS670 across growth rates.** Additional cell cycle analysis for strain YPS670 at different dilution rates: (A) 0.1 hr<sup>-1</sup>, (B) 0.085 hr<sup>-1</sup>, (C) 0.07 hr<sup>-1</sup>. Data displayed as in Figure 5.

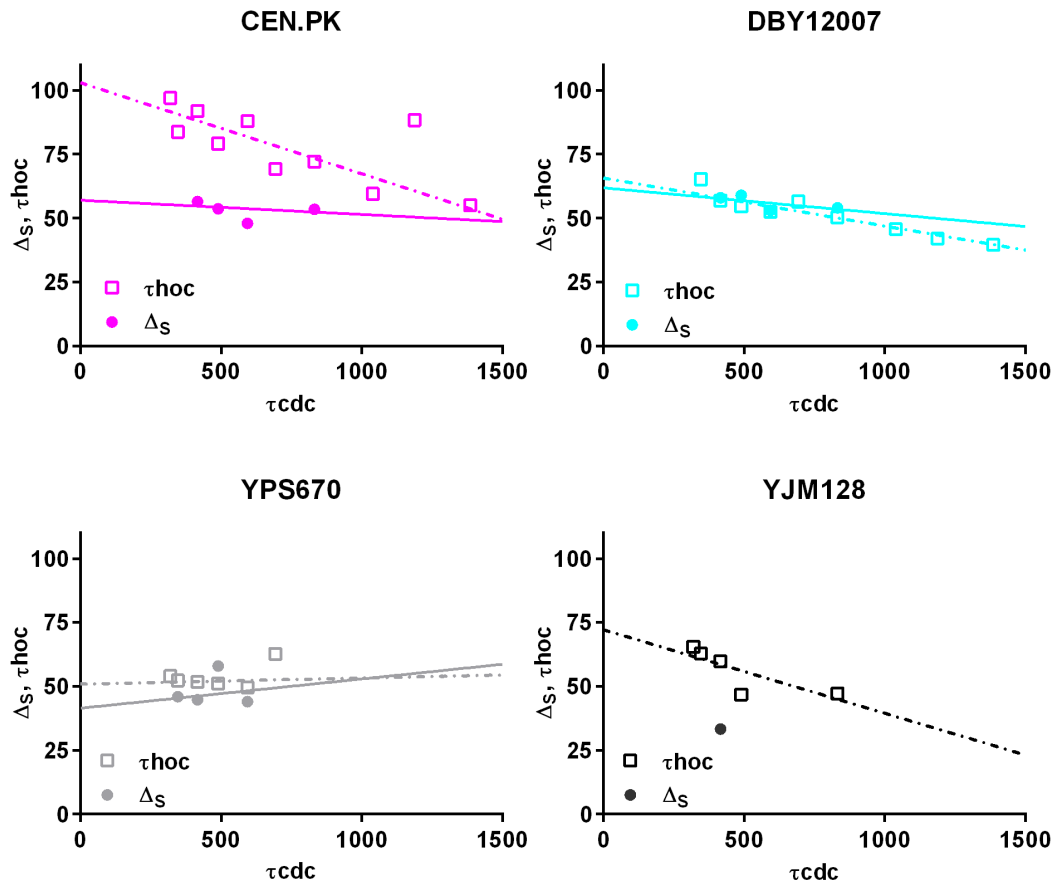

**Figure S6: Relative timing of DNA replication and HOC across strains and growth rates.** Mean  $\Delta_S$  (solid circles) and  $\tau_{hoc}$  (open squares) as a function of  $\tau_{cdc}$  for each strain. Linear regression of  $\Delta_S$  (solid line) and  $\tau_{hoc}$  (dashed line) data shows that DNA replication can occur during HOC ( $\Delta_S < \tau_{hoc}$ ) or LOC ( $\Delta_S > \tau_{hoc}$ ) depending on the strain and the growth rate.

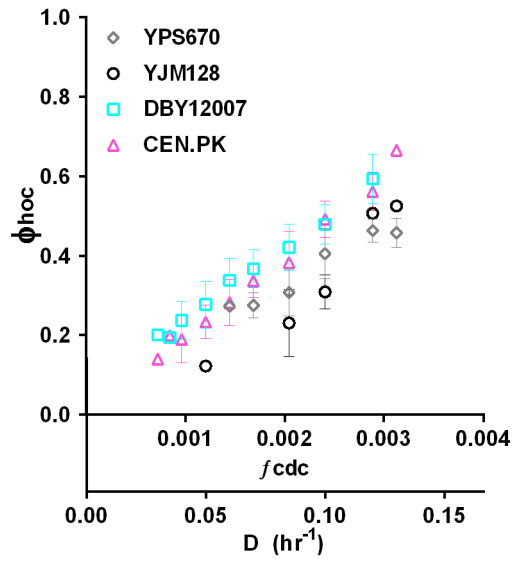

**Figure S7: Fraction of time spent in high oxygen consumption phase ( $\Phi_{hoc}$ ) across strains and growth rate.** We could collapse timescale differences between strains by plotting the fraction of time during a YMC that is spent in HOC ( $\Phi_{hoc} = T_{hoc}/T_{ymc}$ ) as a function of growth rate ( $f_{cdc}$ ). All strains exhibited a similar linear increase in  $\Phi_{hoc}$  as a function of growth rate.

## REFERENCES:

- Chen, C. I., and McDonald, K. A. (1990). Oscillatory behavior of *Saccharomyces cerevisiae* in continuous culture: II. Analysis of cell synchronization and metabolism. *Biotechnol Bioeng* 36, 28–38.
- Chen, Z., Odstrcil, E. A., Tu, B. P., and McKnight, S. L. (2007). Restriction of DNA replication to the reductive phase of the metabolic cycle protects genome integrity. *Science* 316, 1916–1919.
- Kaspar von Meyenburg, H. (1969). Energetics of the budding cycle of *Saccharomyces cerevisiae* during glucose limited aerobic growth. *Arch Mikrobiol* 66, 289–303.
- Keulers, M., Satroutdinov, A. D., Suzuki, T., and Kuriyama, H. (1996a). Synchronization affector of autonomous short- period- sustained oscillation of *Saccharomyces cerevisiae*. *Yeast* 12, 673–682.
- Keulers, M., Suzuki, T., Satroutdinov, A. D., and Kuriyama, H. (1996b). Autonomous metabolic oscillation in continuous culture of *Saccharomyces cerevisiae* grown on ethanol. *FEMS Microbiol Lett* 142, 253–258.
- Klevecz, R. R., Bolen, J., Forrest, G., and Murray, D. B. (2004). A genomewide oscillation in transcription gates DNA replication and cell cycle. *Proc Natl Acad Sci USA* 101, 1200–1205.
- Küenzi, M. T., and Fiechter, A. (1969). Changes in carbohydrate composition and trehalase-activity during the budding cycle of *Saccharomyces cerevisiae*. *Arch Mikrobiol* 64, 396–407.
- Martegani, E., Porro, D., Ranzi, B. M., and Alberghina, L. (1990). Involvement of a cell size control mechanism in the induction and maintenance of oscillations in continuous cultures of budding yeast. *Biotechnol Bioeng* 36, 453–459.
- Murray, A. W., and Marks, D. (2001). Can sequencing shed light on cell cycling? *Nature* 409, 844–846.
- Murray, D. B., Klevecz, R. R., and Lloyd, D. (2003). Generation and maintenance of synchrony in *Saccharomyces cerevisiae* continuous culture. *Exp. Cell Res.* 287, 10–15.
- Müller, D., Exler, S., Aguilera-Vázquez, L., Guerrero-Martín, E., and Reuss, M. (2003). Cyclic AMP mediates the cell cycle dynamics of energy metabolism in *Saccharomyces cerevisiae*. *Yeast* 20, 351–367.
- Parulekar, S. J., Semones, G. B., Rolf, M. J., Lievens, J. C., and Lim, H. C. (1986). Induction and elimination of oscillations in continuous cultures of *Saccharomyces cerevisiae*. *Biotechnol Bioeng* 28, 700–710.
- Porro, D., Martegani, E., Ranzi, B. M., and Alberghina, L. (1988). Oscillations in

continuous cultures of budding yeast: a segregated parameter analysis. *Biotechnol Bioeng* 32, 411–417.

Robertson, J. B., Stowers, C. C., Boczeko, E., and Johnson, C. H. (2008). Real-time luminescence monitoring of cell-cycle and respiratory oscillations in yeast. *Proc Natl Acad Sci USA* 105, 17988–17993.

Satroutdinov, A. D., Kuriyama, H., and Kobayashi, H. (1992). Oscillatory metabolism of *Saccharomyces cerevisiae* in continuous culture. *FEMS Microbiology Letters* 98, 261–268.

Slavov, N., and Botstein, D. (2011). Coupling among growth rate response, metabolic cycle, and cell division cycle in yeast. *Mol Biol Cell* 22, 1997–2009.

Slavov, N., Macinskas, J., Caudy, A., and Botstein, D. (2011). Metabolic cycling without cell division cycling in respiring yeast. *Proc Natl Acad Sci USA* 108, 19090–19095.

Tu, B. P., Kudlicki, A., Rowicka, M., and McKnight, S. L. (2005). Logic of the yeast metabolic cycle: temporal compartmentalization of cellular processes. *Science* 310, 1152–1158.

Xu, Z., and Tsurugi, K. (2006). A potential mechanism of energy-metabolism oscillation in an aerobic chemostat culture of the yeast *Saccharomyces cerevisiae*. *Febs J* 273, 1696–1709.
